# Supplementary material for: Human Mesenchymal stem cells program macrophage plasticity by altering their metabolic status via a PGE2-dependent mechanism
Source: PubMed Central journal article supplement (PMC5133610; doi:10.1038/srep38308), 2016-12-02
Supplement: srep38308-s1.pdf [file srep38308-s1.pdf]

# Human Mesenchymal stem cells program macrophage plasticity by altering their metabolic status *via* a PGE<sub>2</sub>-dependent mechanism

Anoop Babu Vasandan<sup>1</sup>, Sowmya Jahnvi<sup>1</sup>, Chandanala Shashank<sup>1</sup>, Priya Prasad<sup>1</sup>, Anujith

Kumar<sup>1</sup>, S. Jyothi Prasanna<sup>1\*</sup>

<sup>1</sup> School of Regenerative Medicine, Manipal University, Bangalore-560065, India

Email: \* jyothi.prasanna@manipal.edu

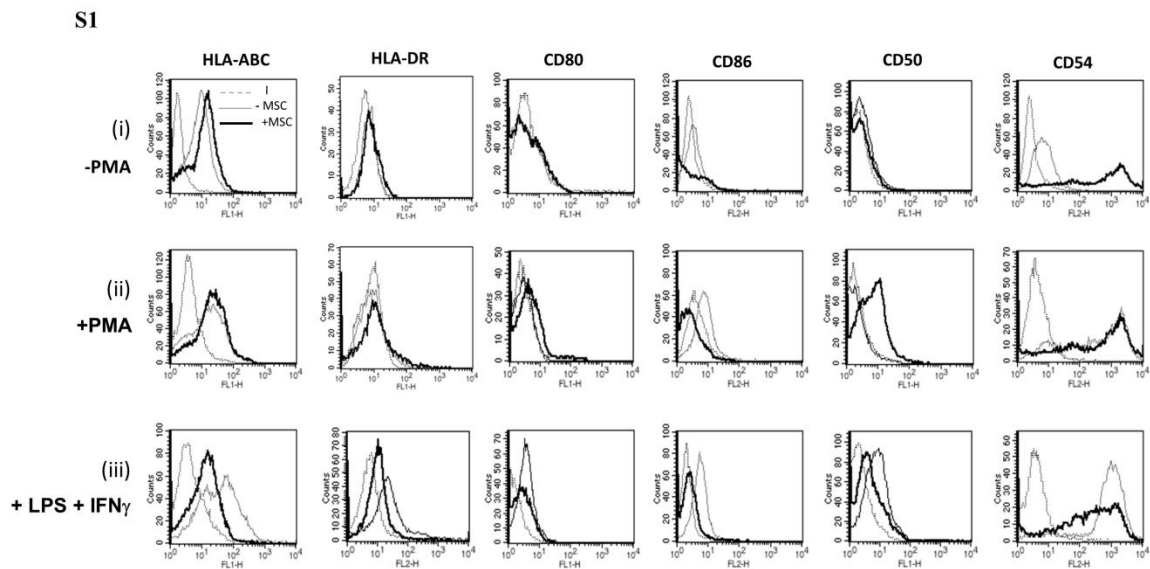

**Supplementary figure 1:** MSCs influence surface expression of key co-stimulatory and immune-adhesive ligands on PMA differentiated and M1 polarized human THP-1 Cells. Flow cytometry of surface antigens associated with APC-capacity of THP1 (i) PMA differentiated THP1 M $\phi$  (ii) M1 polarized THP1 cells (iii). Histogram overlays depict relevant isotype control (I; black dotted line), Thick black line and thin black line indicate surface expression of the specific ligand with and without MSCs respectively. Histograms are representative of three independent experiments.

S2

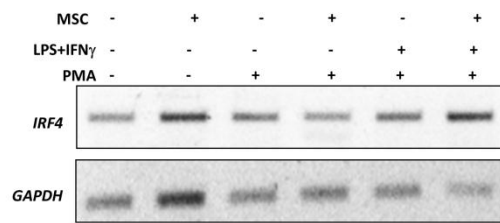

**Supplementary figure 2:** *IRF4* transcript levels in MSC-macrophage co-cultures evaluated on a 1% agarose gel. PCR was run for 20 cycles for *GAPDH* and 25 cycles for *IRF4*.

S3

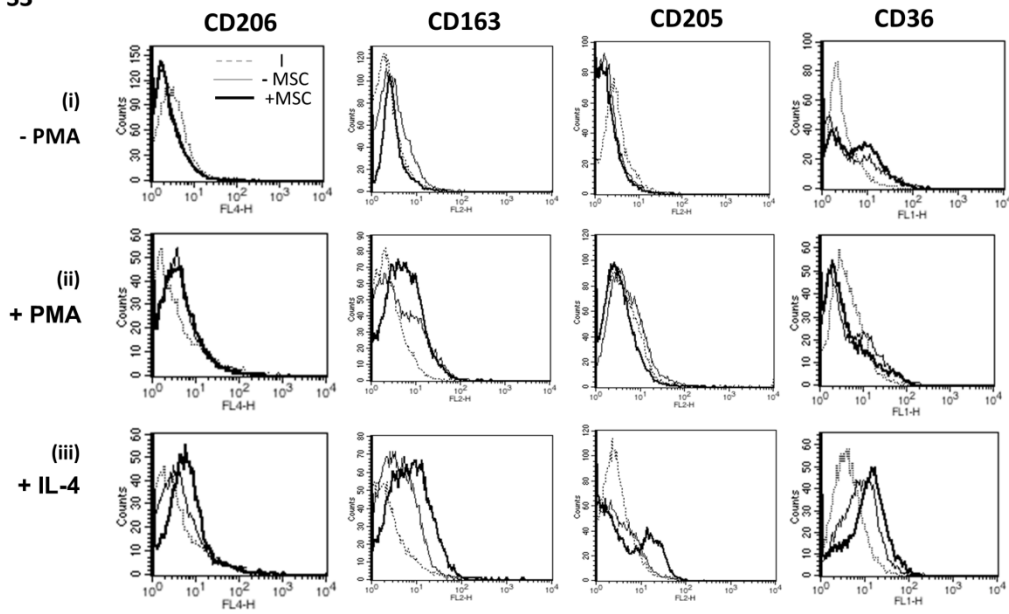

**Supplementary figure 3:** MSCs influence surface expression of key scavenger receptors on PMA differentiated and M2 polarized human THP-1 Cells. Flow cytometry of surface antigens associated with scavenger receptors on THP1 (i) PMA differentiated THP1 M $\phi$  (ii) M2 polarized THP1 cells (iii). Histogram overlays depict relevant isotype control (I; black dotted line), Thick black line and thin black line indicate surface expression of the specific ligand with and without MSCs respectively. Histograms are representative of three independent experiments.

S4

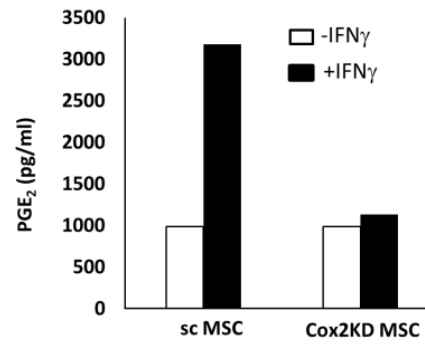

**Supplementary figure 4:** *Cox2* KDN resulted in decrease in PGE<sub>2</sub> secretion in IFN $\gamma$  primed MSC. MSCs were primed with 50 ng/ml of IFN $\gamma$  for 48 hours and PGE<sub>2</sub> was analyzed in the culture supernatants as described in material and methods.

## Supplementary Table 1

### Primers used for real time PCR analysis

| GENE                               | FORWARD PRIMER (5'-3') | REVERSE PRIMER (5'-3')    |
|------------------------------------|------------------------|---------------------------|
| <i>ALOX15</i>                      | CTTAAGGACGACGCCTGGTT   | AGTTTCCCACCGGTACAAC       |
| <i>BAX</i>                         | GCCGTGGACACAGACTCC     | AAGTAGAAAAGGGCGACAACC     |
| <i>BCL2</i>                        | CACCTGTGGTCCACCTGAC    | ACGCTCTCCACACACATGAC      |
| <i>CCL13</i>                       | CAGATGCACTCAACGTCCCA   | TGGTTCTGAAGATGACAGCCTT    |
| <i>CCR7</i>                        | GGCTGGTTCGTGTTGACCTAT  | ACGTAGCGGTCAATGCTGAT      |
| <i>CD11b</i>                       | CCATAGCCAGCGGATAGCAG   | CTTGCCACTTCCCTGGGATT      |
| <i>CD14</i>                        | CACAGTGGGAGCCGCACAGG   | ACGTTGCGTAGGGCGCAAGCT     |
| <i>CD206/MRC1</i>                  | CCAGGGCGAAAGCCAGGGTG   | GTCGTGGGCTTCGGTGGGTG      |
| <i>CD36</i>                        | ACTGAGGACTGCAGTGTAGGA  | ACAAGCTCTGGTTCTTATTCACA   |
| <i>CD68</i>                        | TGGGTGGGATCATCTCCAGT   | CCCCTGGGCTGCCAGTA         |
| <i>CD86</i>                        | TGGAGAGGGAAGAGAGTGAACA | GCCATAAGTGTGCTCTGAA       |
| <i>CPT1<math>\alpha</math></i>     | CCAGACGAAGAACGTGGTCA   | ATCTTGCCGTGCTCAGTGAA      |
| <i>DC-SIGN</i>                     | GAAGTGGCAGACTCCATCA    | GTTGGGCTCTCCTCTGTTC       |
| <i>GAPDH</i>                       | CGACCACTTTGTCAAGCTCA   | AGGGGTCTACATGGCAACTG      |
| <i>HK2</i>                         | GATTTACCAAGCGTGGACT    | CCACACCCACTGTCACTTTG      |
| <i>IDO</i>                         | CCTGAGGAGCTACCATCTGC   | TCAGTGCCTCCAGTTCCTTT      |
| <i>IL-10</i>                       | AAGCCTGACCACGCTTTCTA   | ATGAAGTGGTTGGGGAATGA      |
| <i>IL-12<math>\beta</math></i>     | CCAAGGGGTGACGTGCGGAG   | GGTGGGTCAGGTTTGATGATGTCCC |
| <i>IL-6/IFN<math>\beta</math>2</i> | GAAGTCTTCTCCACAAGCG    | TTTTCTGCCAGTGCCTCTTT      |

| GENE            | FORWARD PRIMER (5'-3')   | REVERSE PRIMER (5'-3')    |
|-----------------|--------------------------|---------------------------|
| <i>IRF4</i>     | CTCTTCAAGGCTTGGGCACT     | AGGGTAAGGCGTTGTCATGG      |
| <i>IRF5</i>     | TAGAGGCTACCCAGGAGCAA     | GCCCACTCCAGAACACCTTA      |
| <i>MSR1</i>     | TTCAACGCAGGAATGTGTCA     | AGCTGTCATTGAGCGAGCAT      |
| <i>p53</i>      | GAAGACCCAGGTCCAGATGA     | TTCTGGGAAGGGACAGAAGA      |
| <i>PCNA</i>     | CCTGGCCATGGGCGTGAACC     | AGCGCCAAGGTATCCGCGTT      |
| <i>PHOX p22</i> | GGGCCATGTGGGCCAACGAA     | CACGCCCGCCACAATGGAGT      |
| <i>PHOX p47</i> | CGCAGGTCGTCCATCCGCAA     | CGGACGCTGTTGCGGCGATA      |
| <i>PHOX p91</i> | TGTGTGAATGCCCCAGTCAA     | ATGGATGGCAAGGCCAATGA      |
| <i>SIRT1</i>    | CACACTTTTAGACCAAGCAGCTAA | TTTCTCCCCAGTACTAGAACCAAC  |
| <i>SOD2</i>     | GGAACAACAGGCCTTATTCCAC   | GAGCTTAACATACTCAGCATAACGA |
| <i>TGFβ1</i>    | CCTACATTTGGAGCCTGGAC     | TGTCCTTAAATACAGCCCCC      |
| <i>TGM2</i>     | GCCCACATCACCAACAACAC     | GTAGAGGTCCCTCTCAGCCA      |
| <i>TNFα</i>     | TGGCCAATGGCGTGGAGCTG     | GTAGGAGACGGCGATGCGGC      |

**Cycling conditions (a)** Real time PCRs: Initial denaturation at 50°C at 2 min and 95 °C for 10 min. cycling at 40 cycles: Denaturation at 95 °C for 15 sec and Annealing/extension at 60 °C for 1 min.  
**(b)** RT-PCR: Initial denaturation at 95 °C for 5 min; Denaturation at 95 °C for 30 sec, 61 °C for 45 sec and 72 °C for 30sec; final extension 72 °C for 10min.
